# Supplementary material for: Comparative Study of Temporal Changes in Pigments and Optical Properties in Sepals of Helleborus odorus and H. niger from Prebloom to Seed Production
Source: MDPI journal article supplement (doi:10.3390/plants11010119), 2021-12-31
Supplement: s1 [file s1]

**Table S1** *Helleborus odorus* and *H. niger* sepal reflectance and transmittance in the different regions of the spectrum for the different developmental phases.

| Traits                   | Species and developmental phase |                             |                            |                            |                           |                            |
|--------------------------|---------------------------------|-----------------------------|----------------------------|----------------------------|---------------------------|----------------------------|
|                          | Developing phase                |                             | Flowering phase            |                            | Fruiting phase            |                            |
|                          | <i>H. odorus</i>                | <i>H. niger</i>             | <i>H. odorus</i>           | <i>H. niger</i>            | <i>H. odorus</i>          | <i>H. niger</i>            |
| <b>Reflectance (%)</b>   |                                 |                             |                            |                            |                           |                            |
| UV-B                     | 13.08 ± 1.77 <sup>b</sup>       | 10.36 ± 1.14 <sup>a</sup>   | 14.39 ± 2.01 <sup>c</sup>  | 11.10 ± 0.81 <sup>a</sup>  | 14.83 ± 1.76 <sup>c</sup> | 10.45 ± 0.73 <sup>a</sup>  |
| UV-A                     | 9.39 ± 1.29 <sup>b</sup>        | 8.23 ± 0.70 <sup>a</sup>    | 10.79 ± 1.31 <sup>c</sup>  | 9.16 ± 0.49 <sup>b</sup>   | 10.96 ± 1.28 <sup>c</sup> | 7.85 ± 0.42 <sup>a</sup>   |
| Violet                   | 7.66 ± 1.00 <sup>a</sup>        | 25.57 ± 6.98 <sup>b</sup>   | 7.90 ± 1.02 <sup>a</sup>   | 30.28 ± 3.64 <sup>c</sup>  | 8.92 ± 1.04 <sup>a</sup>  | 9.43 ± 1.14 <sup>a</sup>   |
| Blue                     | 8.77 ± 1.19 <sup>a</sup>        | 33.18 ± 10.41 <sup>b</sup>  | 9.11 ± 1.81 <sup>a</sup>   | 38.76 ± 4.95 <sup>c</sup>  | 9.13 ± 0.86 <sup>a</sup>  | 11.09 ± 1.65 <sup>a</sup>  |
| Green                    | 22.53 ± 3.31 <sup>ab</sup>      | 31.10 ± 12.12 <sup>cd</sup> | 22.08 ± 3.63 <sup>ab</sup> | 36.25 ± 5.69 <sup>d</sup>  | 19.94 ± 1.87 <sup>a</sup> | 26.10 ± 3.17 <sup>bc</sup> |
| Yellow                   | 19.77 ± 3.55 <sup>ab</sup>      | 36.45 ± 10.11 <sup>c</sup>  | 20.09 ± 3.77 <sup>ab</sup> | 39.28 ± 4.38 <sup>c</sup>  | 16.78 ± 1.51 <sup>a</sup> | 24.24 ± 3.00 <sup>b</sup>  |
| Red                      | 13.18 ± 2.41 <sup>a</sup>       | 46.33 ± 5.39 <sup>d</sup>   | 13.74 ± 2.64 <sup>a</sup>  | 43.04 ± 3.42 <sup>c</sup>  | 11.80 ± 0.93 <sup>a</sup> | 17.21 ± 2.35 <sup>b</sup>  |
| NIR                      | 43.84 ± 2.72 <sup>ab</sup>      | 49.93 ± 4.36 <sup>b</sup>   | 37.98 ± 2.09 <sup>a</sup>  | 42.78 ± 3.43 <sup>ab</sup> | 78.43 ± 1.81 <sup>c</sup> | 71.17 ± 22.4 <sup>c</sup>  |
| <b>Transmittance (%)</b> |                                 |                             |                            |                            |                           |                            |
| UV-B                     | 0.07 ± 0.07 <sup>a</sup>        | 2.65 ± 7.97 <sup>a</sup>    | 0.16 ± 0.05 <sup>a</sup>   | 0.26 ± 0.09 <sup>a</sup>   | -0.02 ± 0.10 <sup>a</sup> | -0.04 ± 0.09 <sup>a</sup>  |
| UV-A                     | 0.06 ± 0.05 <sup>a</sup>        | 0.43 ± 0.28 <sup>a</sup>    | 0.10 ± 0.10 <sup>a</sup>   | 2.82 ± 4.92 <sup>b</sup>   | -1.05 ± 3.15 <sup>a</sup> | 0.10 ± 0.44 <sup>a</sup>   |
| Violet                   | 0.88 ± 0.52 <sup>a</sup>        | 22.81 ± 7.18 <sup>b</sup>   | 0.65 ± 0.35 <sup>a</sup>   | 33.62 ± 6.83 <sup>c</sup>  | 0.41 ± 0.32 <sup>a</sup>  | 2.36 ± 1.02 <sup>a</sup>   |
| Blue                     | 3.05 ± 1.75 <sup>a</sup>        | 32.73 ± 9.83 <sup>b</sup>   | 2.16 ± 0.94 <sup>a</sup>   | 45.98 ± 8.83 <sup>c</sup>  | 1.25 ± 0.73 <sup>a</sup>  | 4.81 ± 1.77 <sup>a</sup>   |
| Green                    | 25.42 ± 7.02 <sup>b</sup>       | 35.34 ± 13.15 <sup>c</sup>  | 22.14 ± 2.79 <sup>b</sup>  | 47.22 ± 8.28 <sup>d</sup>  | 15.20 ± 3.24 <sup>a</sup> | 21.48 ± 3.83 <sup>ab</sup> |
| Yellow                   | 23.60 ± 7.99 <sup>b</sup>       | 42.20 ± 12.44 <sup>c</sup>  | 21.54 ± 2.99 <sup>b</sup>  | 52.47 ± 9.14 <sup>d</sup>  | 13.43 ± 3.35 <sup>a</sup> | 21.52 ± 3.44 <sup>b</sup>  |
| Red                      | 13.17 ± 5.70 <sup>ab</sup>      | 51.10 ± 12.90 <sup>c</sup>  | 11.73 ± 2.11 <sup>ab</sup> | 56.92 ± 8.47 <sup>c</sup>  | 6.77 ± 2.17 <sup>a</sup>  | 13.87 ± 2.71 <sup>b</sup>  |
| NIR                      | 65.86 ± 6.69 <sup>b</sup>       | 62.45 ± 12.58 <sup>ab</sup> | 56.74 ± 3.84 <sup>a</sup>  | 60.38 ± 6.01 <sup>ab</sup> | 58.78 ± 3.42 <sup>a</sup> | 59.60 ± 3.38 <sup>ab</sup> |

Data are means ± SD; n = 10

Different superscript letters within each row indicate significant differences between the means ( $p \leq 0.05$ ; Duncan's tests)

Reflectance and transmittance spectra represent means within 5-nm intervals ( $p \leq 0.05$ ; Duncan's tests)

NIR, near infrared
